# Supplementary material for: Spectral Intensity Bioaerosol Sensor (SIBS): A new Instrument for Spectrally Resolved FluorescenceDetection of Single Particles in Real-Time
Source: Copernicus journal article supplement (doi:10.5194/amt-2018-390), 2018-11-12
Supplement: Supplementary file 1 [file amt-2018-390-supplement.pdf]

*Supplement to*

**Spectral Intensity Bioaerosol Sensor (SIBS):  
A new Instrument for Spectrally Resolved Fluorescence Detection  
of Single Particles in Real-Time**

Tobias Könnemann<sup>1</sup>, Nicole Savage<sup>2a</sup>, Thomas Klimach<sup>1</sup>, David Walter<sup>1</sup>, Janine Fröhlich-Nowoisky<sup>1</sup>, Hang Su<sup>1</sup>, Ulrich Pöschl<sup>1</sup>, J. Alex Huffman<sup>2</sup>, and Christopher Pöhlker<sup>1</sup>

<sup>1</sup>*Max Planck Institute for Chemistry, Multiphase Chemistry Department, P.O. Box 3060, D-55020 Mainz, Germany*

<sup>2</sup>*University of Denver, Department of Chemistry and Biochemistry, 2190 E. Iliff Ave., Denver, Colorado 80208, USA*

<sup>a</sup> *Now at Aerosol Devices Inc., 430 North College Avenue # 430, Fort Collins, Colorado 80524, USA*

*Correspondence to:*

J. A. Huffman (alex.huffman@du.edu) and C. Pöhlker (c.pohlker@mpic.de)

**This file includes:**

Supplementary Tables S1 to S2

Supplementary Figures S1 to S14

**Table S1.** Summary of physical properties of Polystyrene latex spheres (PSLs) and polystyrene-divenylbenzene particles (PS-DVB) used in this study. Stated properties are taken from manufacturer information. SD: Standard deviation, RI: Refraction index at 589 nm and 25°C.

| Diameter (μm) | SD (μm) | Confidence | RI   | Material | Color / Dye                           | $\lambda_{ex}/\lambda_{em}$ (nm) | Provider                    | Catalog code |
|---------------|---------|------------|------|----------|---------------------------------------|----------------------------------|-----------------------------|--------------|
| 0.3           | 0.0148  | CV= 5.1%   | 1.59 | PSL      | Non-fluorescent                       | Non-fluorescent                  | Polysciences Inc.           | 64015        |
| 0.356         | 0.014   | CV= 3.9%   | 1.59 | PSL      | Non-fluorescent                       | Non-fluorescent                  | Polysciences Inc.           | 64016        |
| 0.4           | 0.0073  | CV= 1.8%   | 1.59 | PSL      | Non-fluorescent                       | Non-fluorescent                  | Thermo-Fisher               | 3400A        |
| 0.5           | 0.0079  | CV= 1.6%   | 1.59 | PSL      | Non-fluorescent                       | Non-fluorescent                  | Duke Scientific Corporation | 3500A        |
| 0.53          | N/A     | N/A        | 1.59 | PSL      | Plum Purple / Proprietary             | 360 / 420                        | Bangs Laboratories Inc.     | FS03F        |
| 0.6           | 0.010   | CV= 1.7%   | 1.59 | PSL      | Non-fluorescent                       | Non-fluorescent                  | Thermo-Fisher               | 3600A        |
| 0.7           | 0.0083  | CV= 1.2%   | 1.59 | PSL      | Non-fluorescent                       | Non-fluorescent                  | Thermo-Fisher               | 3700A        |
| 0.8           | 0.0083  | CV= 1%     | 1.59 | PSL      | Non-fluorescent                       | Non-fluorescent                  | Thermo-Fisher               | 3800A        |
| 0.9           | 0.0041  | CV= 0.5%   | 1.59 | PSL      | Non-fluorescent                       | Non-fluorescent                  | Thermo-Fisher               | 3900A        |
| 1             | 0.010   | CV = 1.0%  | 1.59 | PSL      | Non-fluorescent                       | Non-fluorescent                  | Duke Scientific Corporation | 4009A        |
| 1.6           | 0.020   | CV= 1.3    | 1.59 | PSL      | Non-fluorescent                       | Non-fluorescent                  | Thermo-Fisher               | 4016A        |
| 2             | 0.021   | CV= 1.0%   | 1.59 | PSL      | Non-fluorescent                       | Non-fluorescent                  | Thermo-Fisher               | 4202A        |
| 2             | N/A     | CV= < 5%   | 1.59 | PSL      | Red / Firefli™<br>Fluorescent Red     | 542 / 612                        | Thermo-Fisher               | R0200        |
| 2             | N/A     | CV= < 5%   | 1.59 | PSL      | Green / Firefli™<br>Fluorescent Green | 468 / 508                        | Thermo-Fisher               | G0200        |
| 2             | N/A     | CV= < 5%   | 1.59 | PSL      | Blue / Firefli™<br>Fluorescent Blue   | 368,388,412 /<br>445, 445, 473   | Thermo-Fisher               | B0200B       |
| 2.07          | 0.15    | N/A        | 1.59 | PSL      | Plum Purple / Proprietary             | 360 / 420                        | Bangs Laboratories Inc.     | FS05F        |
| 3             | 0.032   | CV=1.1%    | 1.59 | PSL      | Non-fluorescent                       | Non-fluorescent                  | Thermo-Fisher               | 4203A        |
| 4             | 0.04    | CV = 1.0%  | 1.59 | PSL      | Non-fluorescent                       | Non-fluorescent                  | Thermo-Fisher               | 4204A        |
| 4.52          | 0.15    | CV = 3.0%  | 1.59 | PSL      | Non-fluorescent                       | Non-fluorescent                  | Polysciences Inc.           | 17135        |
| 5             | 0.6     | CV=11%     | 1.59 | PS-DVB   | Non-fluorescent                       | Non-fluorescent                  | Thermo-Fisher               | DC-05        |
| 7             | 0.7     | CV= 10%    | 1.59 | PS-DVB   | Non-fluorescent                       | Non-fluorescent                  | Thermo-Fisher               | DC-07        |
| 8             | 0.8     | CV= 10%    | 1.59 | PS-DVB   | Non-fluorescent                       | Non-fluorescent                  | Thermo-Fisher               | DC-08        |
| 10            | 0.9     | CV=9.2%    | 1.59 | PS-DVB   | Non-fluorescent                       | Non-fluorescent                  | Thermo-Fisher               | DC-10        |
| 15            | 1.8     | CV=11%     | 1.59 | PS-DVB   | Non-fluorescent                       | Non-fluorescent                  | Thermo-Fisher               | DC-15        |
| 20            | 1.7     | CV=8.9%    | 1.59 | PS-DVB   | Non-fluorescent                       | Non-fluorescent                  | Thermo-Fisher               | DC-20        |

**Table S2.** Summary of reference particles used within this study. All biofluorophores, iron oxide ( $\text{Fe}_3\text{O}_4$ ), and carbon nanotubes were purchased from Sigma-Aldrich, St. Louis, MO, USA. Ammonium sulfate was purchased from Fisher Scientific, Hampton, NH, USA.

| Reference particles     | CAS Nr.     |
|-------------------------|-------------|
| Bacteriochlorophyll     | 17499-98-8  |
| Chlorophyll <i>a</i>    | 479-61-8    |
| Chlorophyll <i>b</i>    | 519-62-0    |
| NAD                     | 606-68-8    |
| Riboflavin              | 83-88-5     |
| Tryptophan              | 73-22-3     |
| Tyrosine                | 556-02-5    |
| $\text{Fe}_3\text{O}_4$ | 1317-61-9   |
| Carbon nanotubes        | 308068-56-6 |
| Ammonium sulfate        | 7783-20-2   |

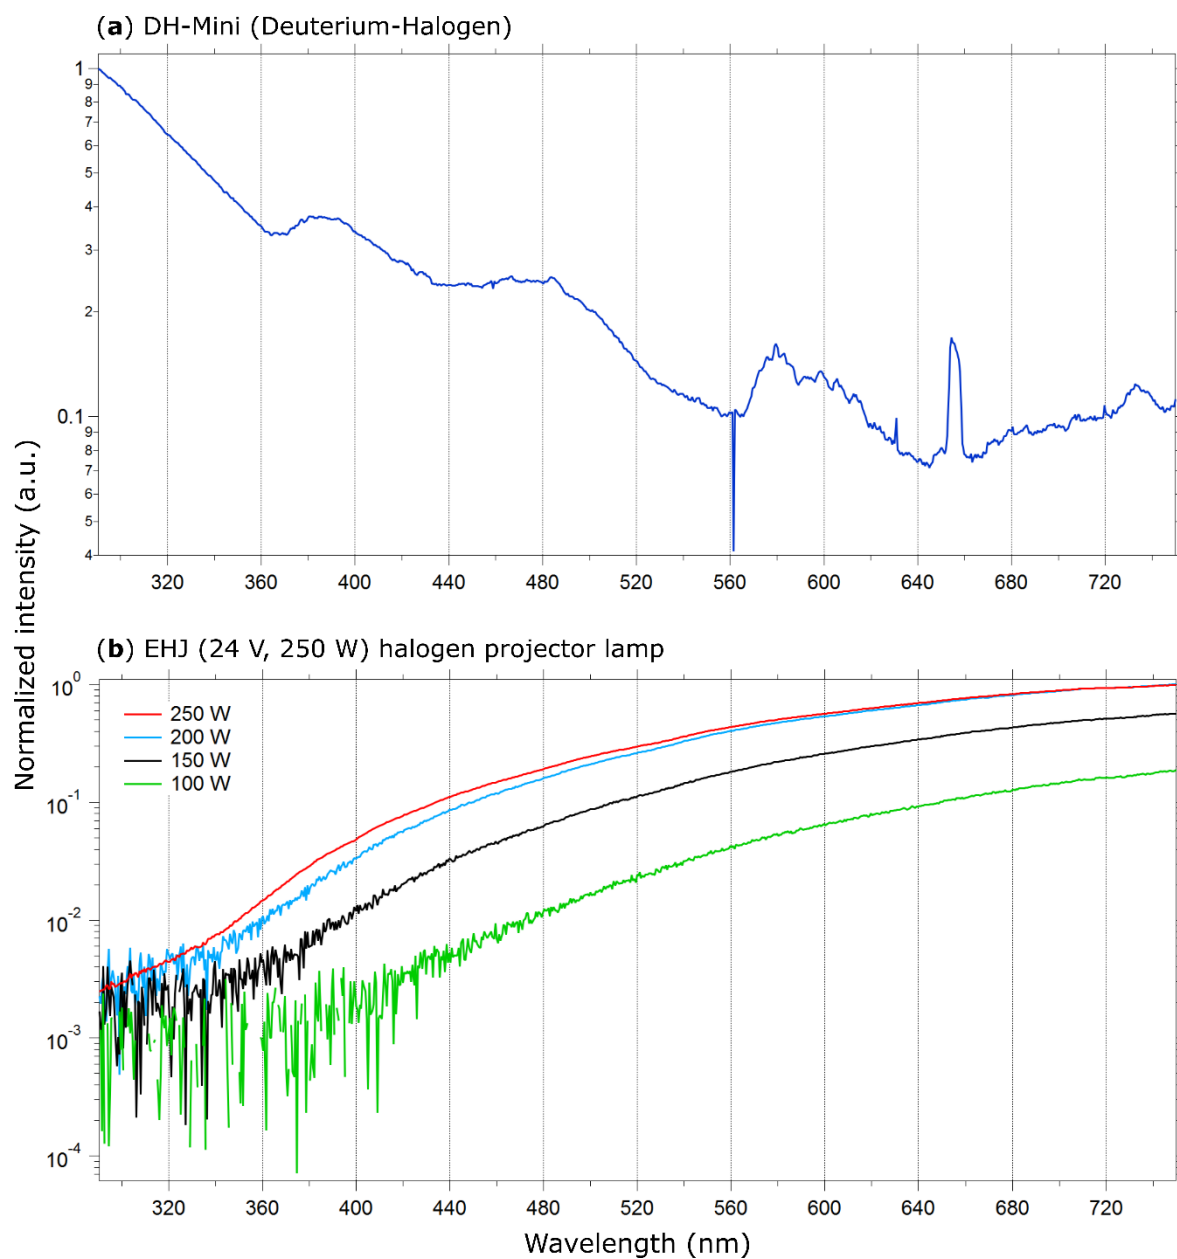

10 **Figure S1.** Normalized and averaged calibration lamp spectra. In (a), the spectrum of a  
 11 deuterium-halogen lamp (DH-Mini, Ocean Optics) is shown, in (b) the spectra of a halogen  
 12 projector lamp (EHJ 24V250W, Ushio), both measured with the Dual-FL spectrometer  
 13 (Horiba).

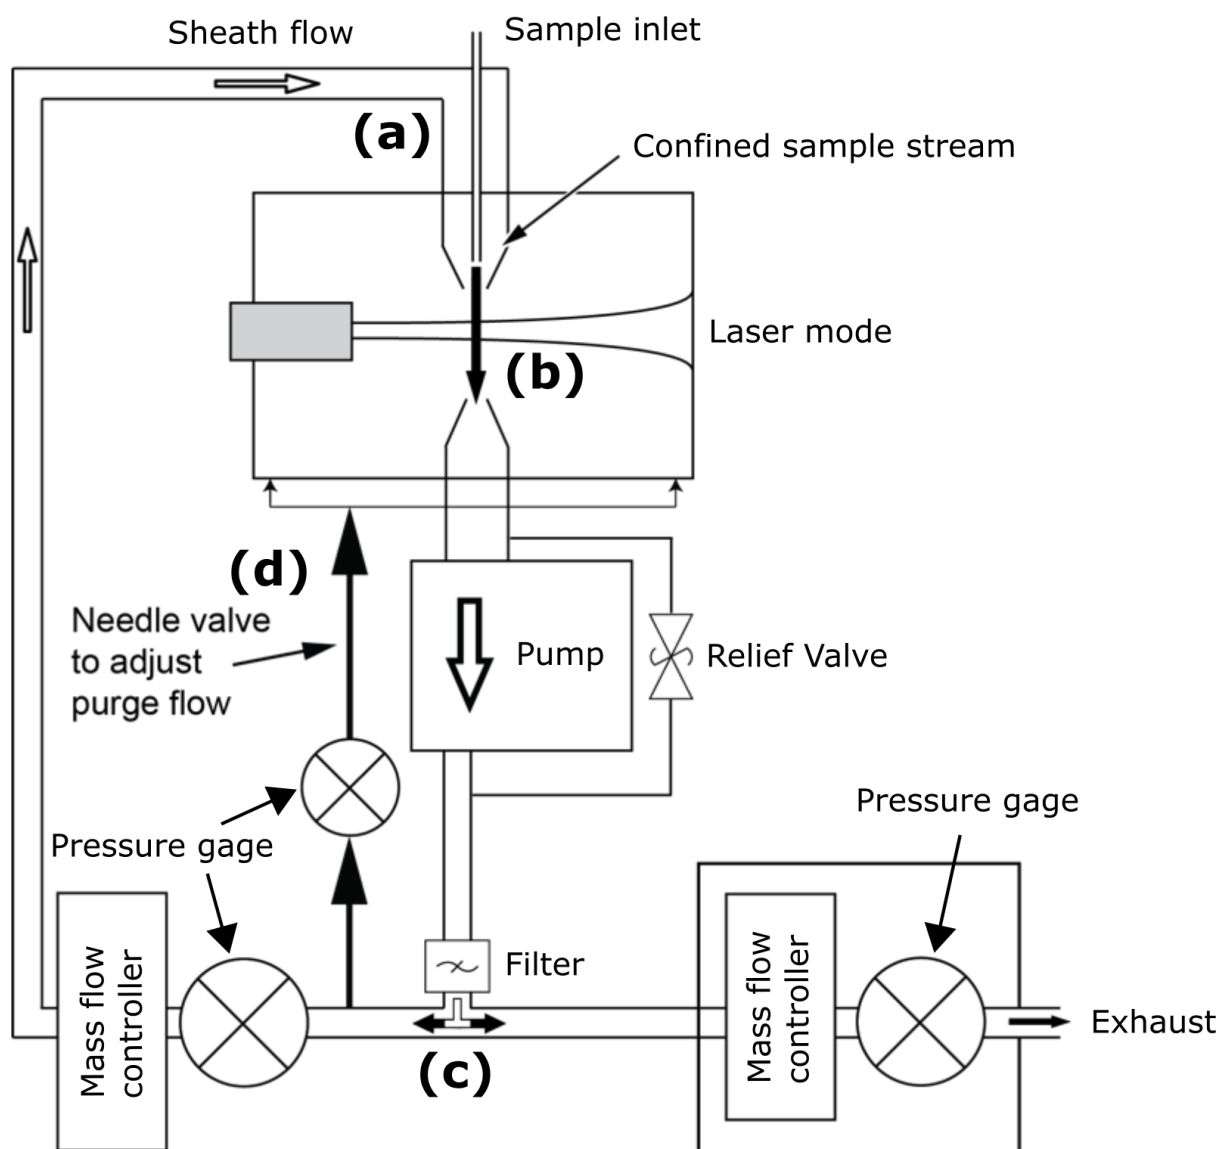

**Figure S2.** Flow diagram for the SIBS. Aerosol is drawn via a tapered delivery nozzle (a) into the optical cavity. The intersection of sample flow and laser beam defines a sampling volume with approximately 0.7 mm in diameter and 130  $\mu\text{m}$  depth (b). The sheath flow is filtered through a HEPA filter and recirculates in the system (c). A small purge flow, which is adjusted by a needle valve (d), constantly purges the optical cavity (Modified, image courtesy: DMT).

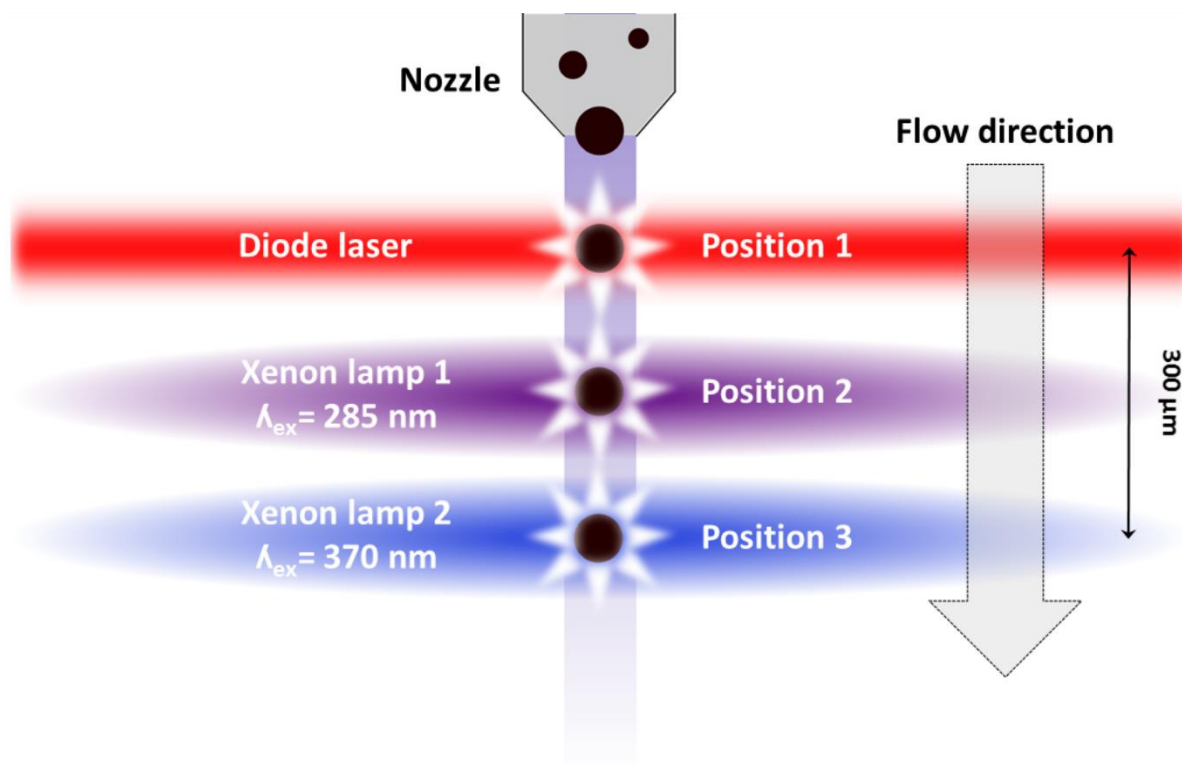

19 **Figure S3.** Schematic diagram of particle size and fluorescence detection. Position 1: Particles  
 20 scatter light in all directions after being illuminated by a diode laser ( $\lambda = 785 \text{ nm}$ ). Position 2:  
 21 Xenon lamp 1 is firing at  $\lambda_{\text{ex}} = 285 \text{ nm}$ . Position 3: Xenon lamp 2 is firing at  $\lambda_{\text{ex}} = 370 \text{ nm}$ . The  
 22 measurement cycle from position 1 to position 3 takes  $\sim 25 \mu\text{s}$  over a distance of  $\sim 300 \mu\text{m}$ .  
 23 (Modified, adapted from WIBS-4A service manual (DOC-0345 Rev A), DMT; 2012).

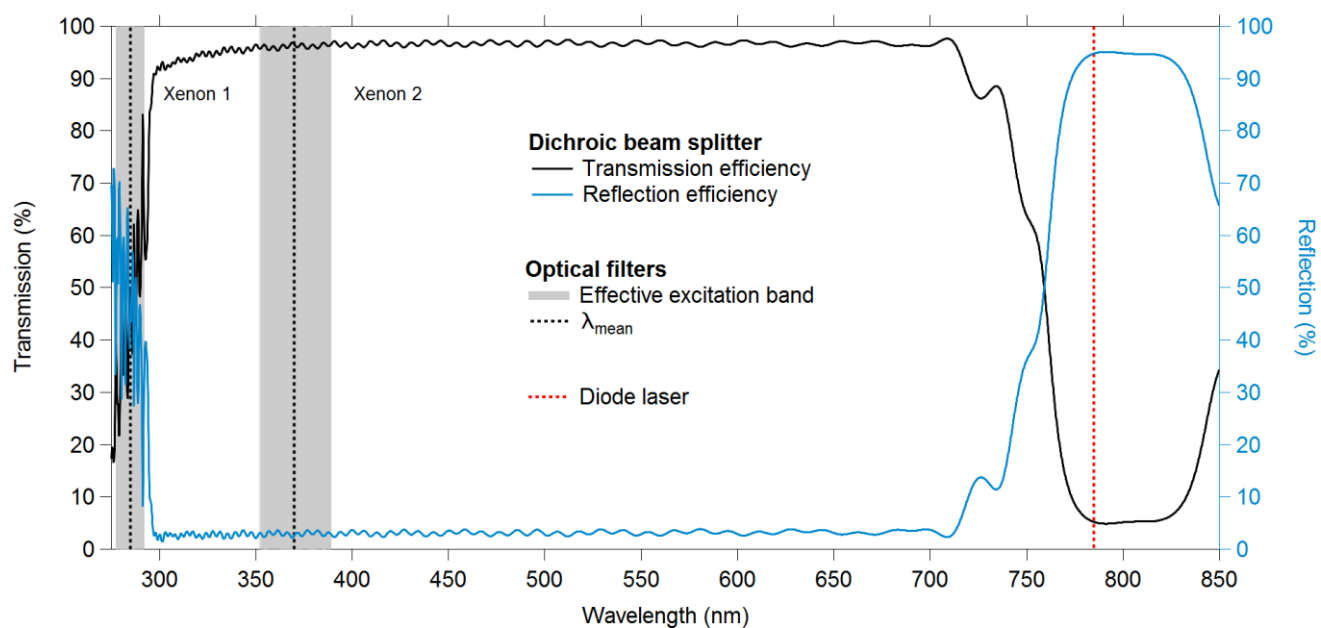

24 **Figure S4.** Transmission and reflection efficiency of the dichroic beam splitter. The beam  
 25 splitter transmits fluorescence emission (black line) to the grating polychromator and reflects  
 26 scattering light (blue line) to the particle sizing- and detection PMT. (Data courtesy: Semrock).

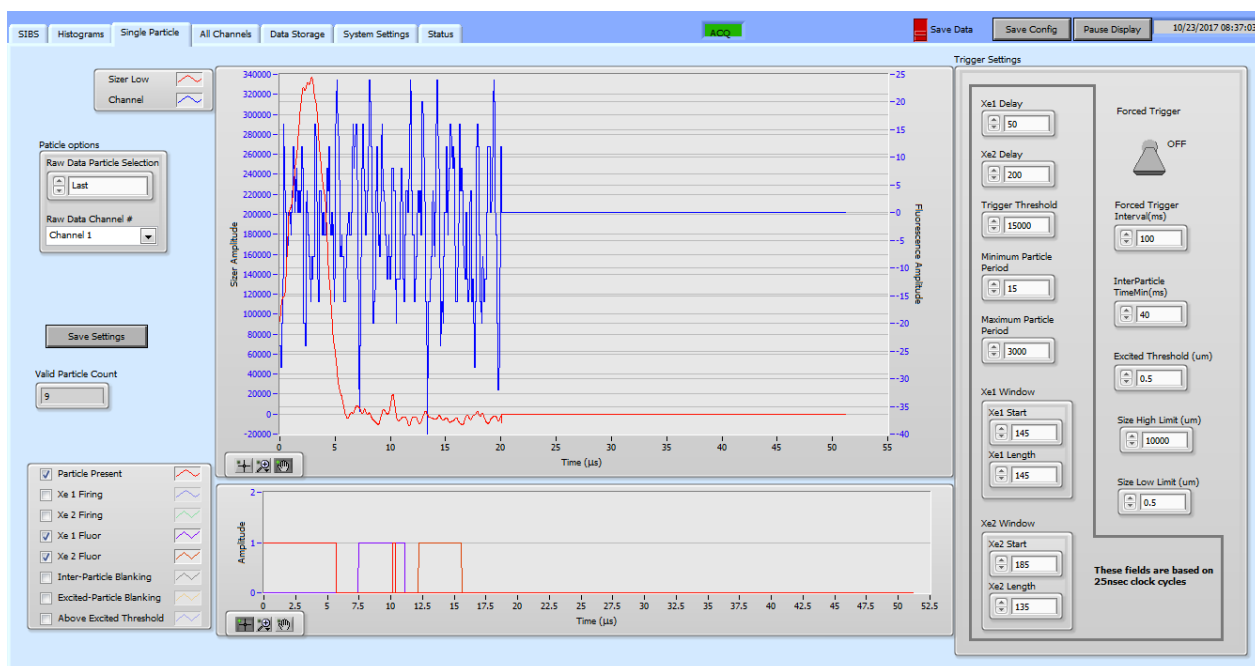

27 **Figure S5.** “Single Particle” tab of the SIBS user interface.



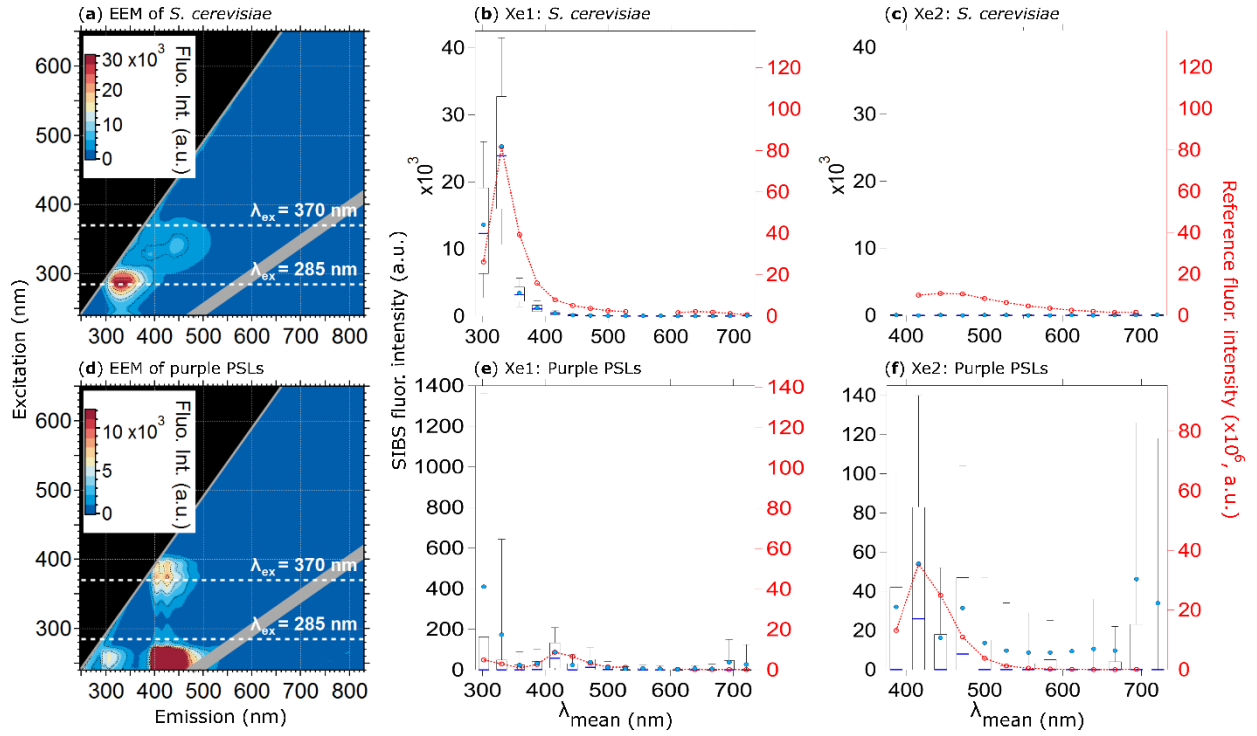

**Figure S6.** Corrected fluorescence emission of *S. cerevisiae* and 0.53  $\mu\text{m}$  purple PSLs. Steady-state fluorescence signatures displayed as EEMs (left column) and spectra at Xe1 and Xe2 (middle, right columns) for: *S. cerevisiae* (a, b and c, size range between 4 - 10  $\mu\text{m}$ , 1057 particles), and 0.53  $\mu\text{m}$  purple PSLs (d, e, and f, 5260 particles). Within EEMs: white dashed lines show SIBS excitation wavelengths ( $\lambda_{\text{ex}} = 285$  and 370 nm), grey diagonal lines indicate 1<sup>st</sup> and 2<sup>nd</sup> order elastic scattering bands (both bands were subtracted automatically by the Aqualog V3.6 software).

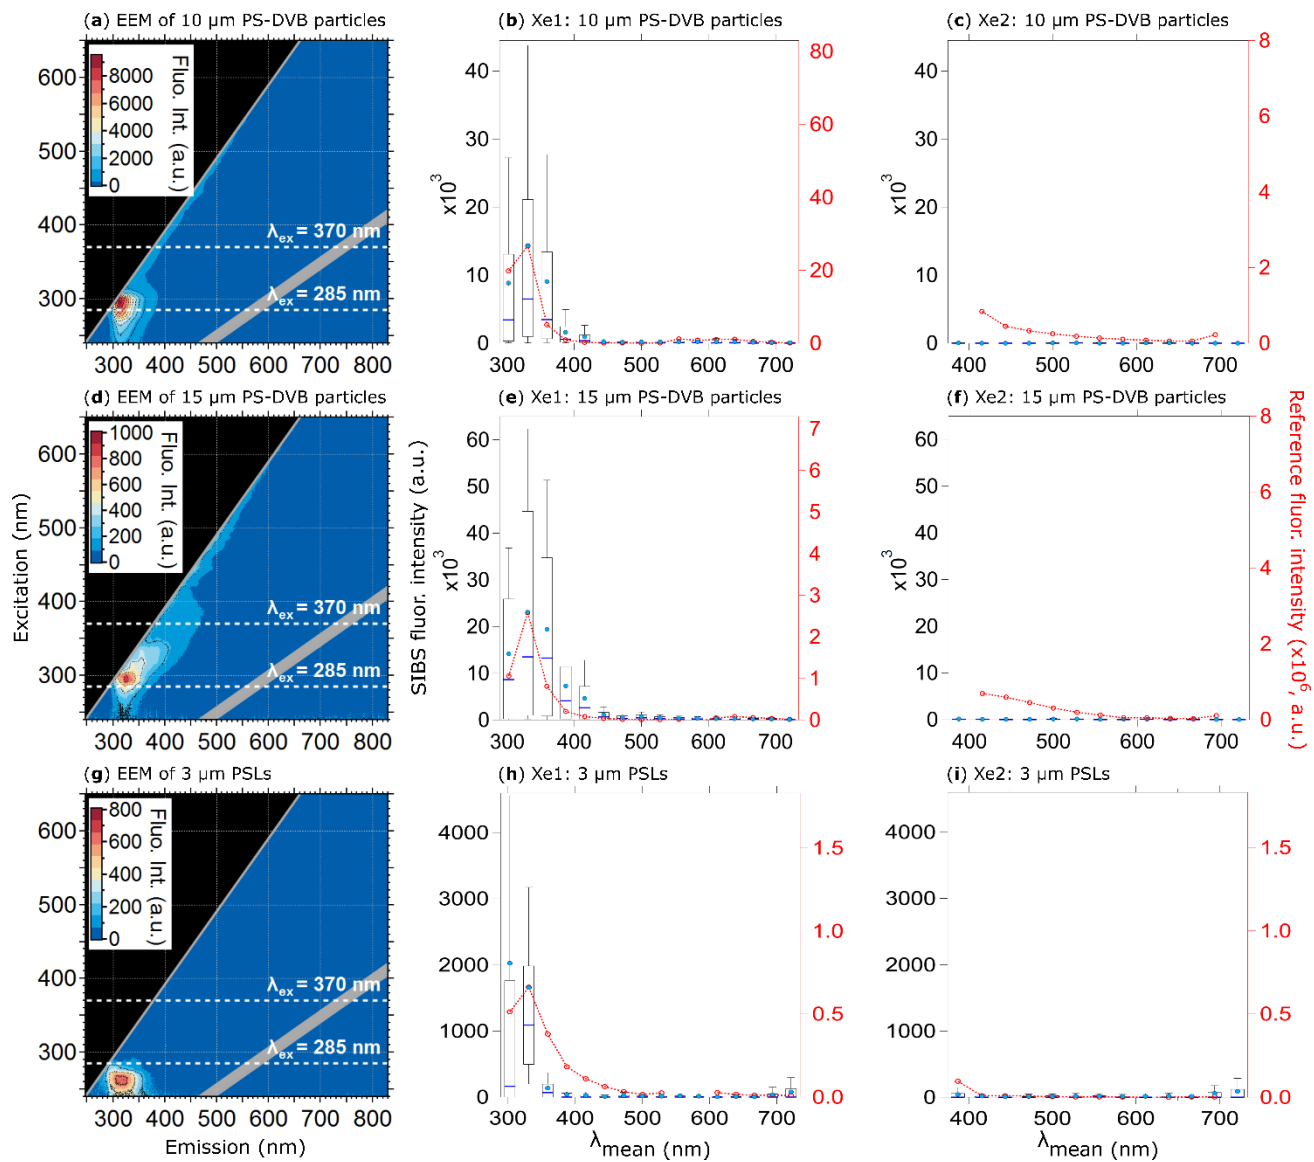

35 **Figure S7.** Fluorescence signatures of non-fluorescent particles. Highlighted are EEMs (left  
 36 column) and spectra at Xe1 and Xe2 (middle, right columns) for: 10  $\mu\text{m}$  (a, b, and c,  
 37 uncorrected, 367 particles) and 15  $\mu\text{m}$  (d, e, and f, uncorrected, 400 particles) PS-DVB  
 38 particles, and 3  $\mu\text{m}$  PSLs (g, h, and i, corrected, 2396 particles).

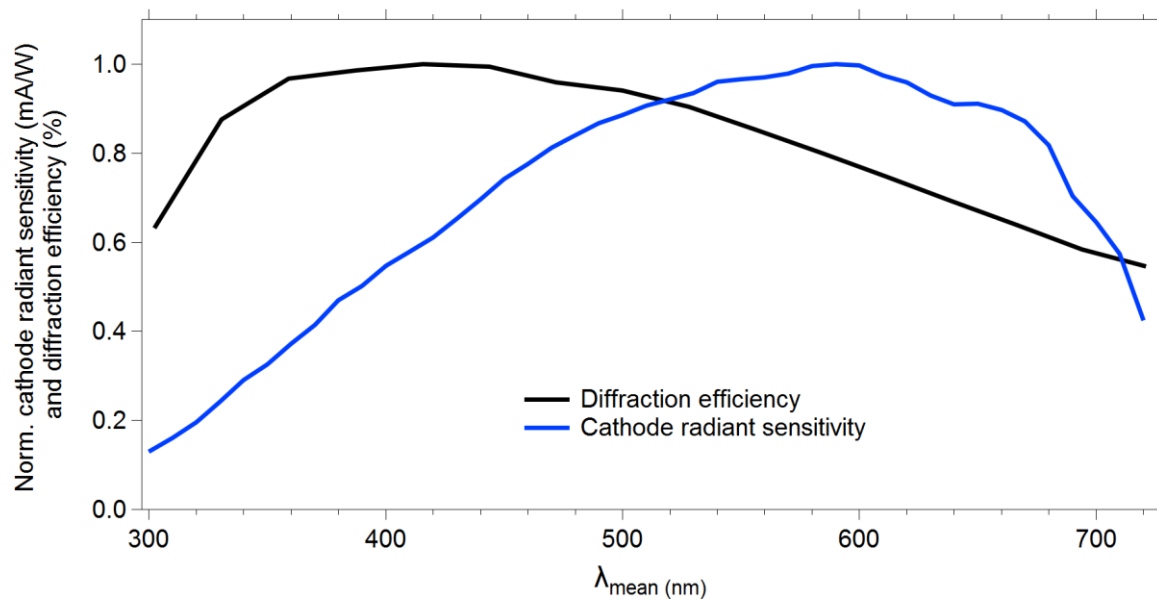

39 **Figure S8.** Normalized cathode radiant sensitivity of the PMT and diffraction efficiency of the  
 40 grating. The cathode radiant sensitivity multiplied by the diffraction efficiency results in the  
 41 theoretical detector responsivity shown in Figure 6. (Data courtesy: Hamamatsu).

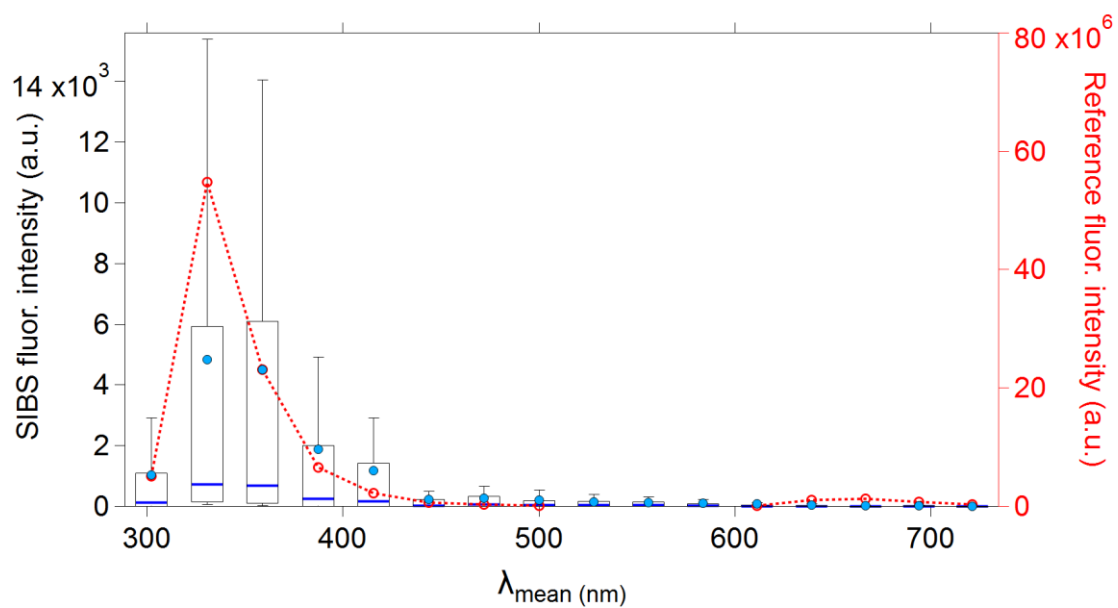

42 **Figure S9.** Uncorrected fluorescence spectra of tryptophan at Xe1 in a size range between 1 –  
 43 2  $\mu\text{m}$ .

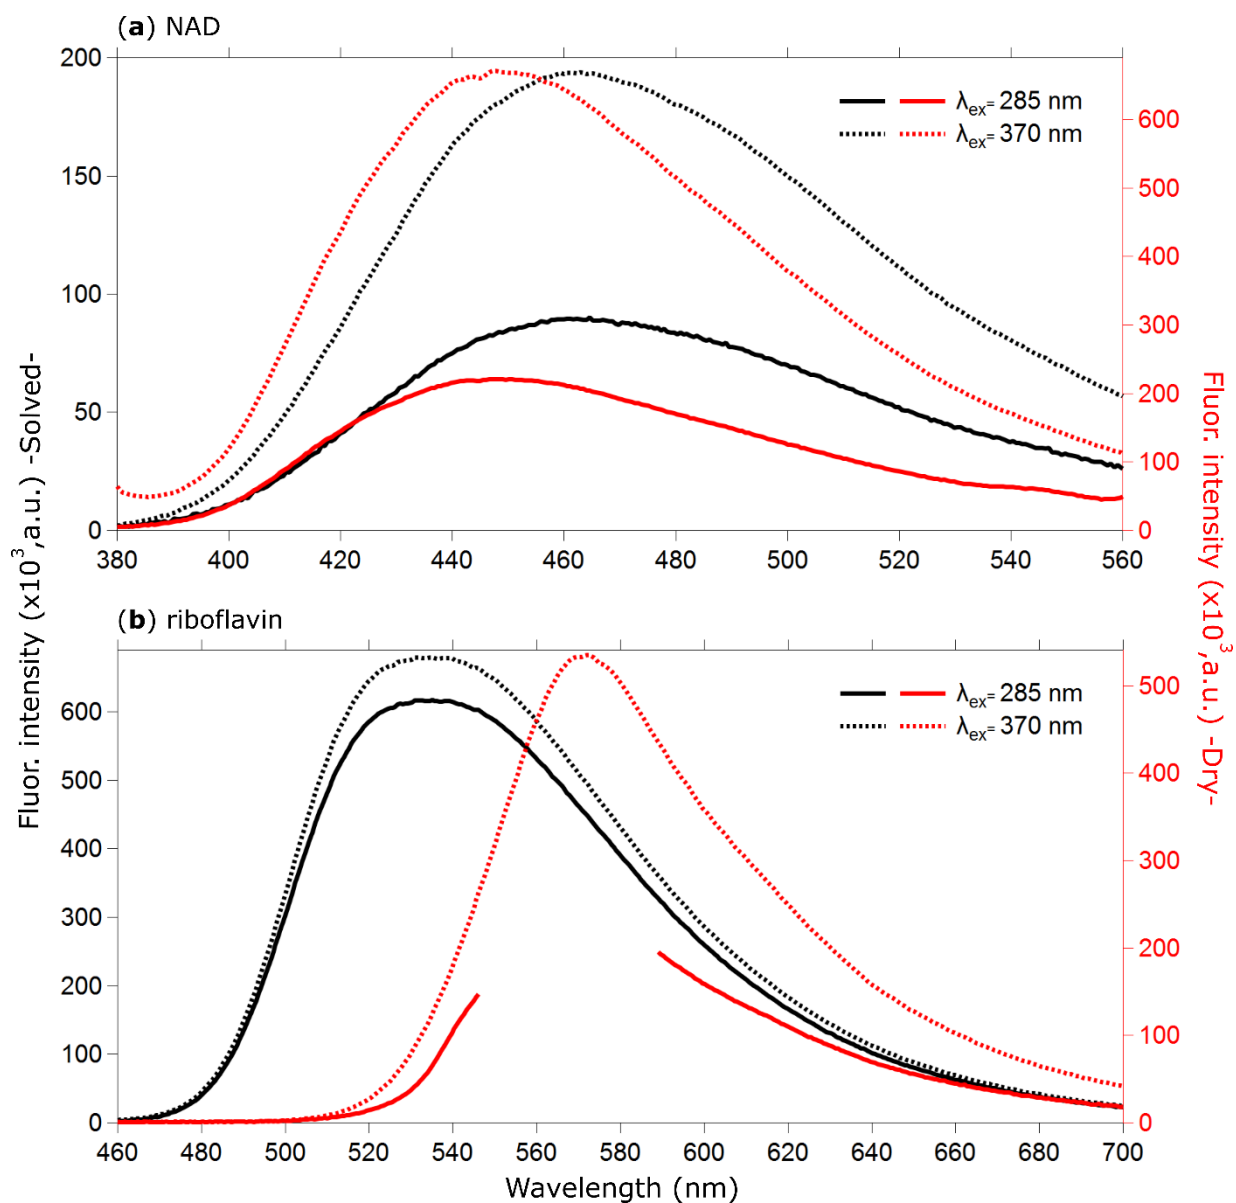

**Figure S10.** Dry vs. solved. Shown are reference spectra for NAD (a) and riboflavin (b) in dry and solved state. Data coinciding with 2<sup>nd</sup> order elastic scattering were removed (b, red solid line). Peak maxima: NAD (dry): ~448 nm, NAD (solved): ~463 nm, riboflavin (dry): ~572 nm, riboflavin (solved): ~535 nm.

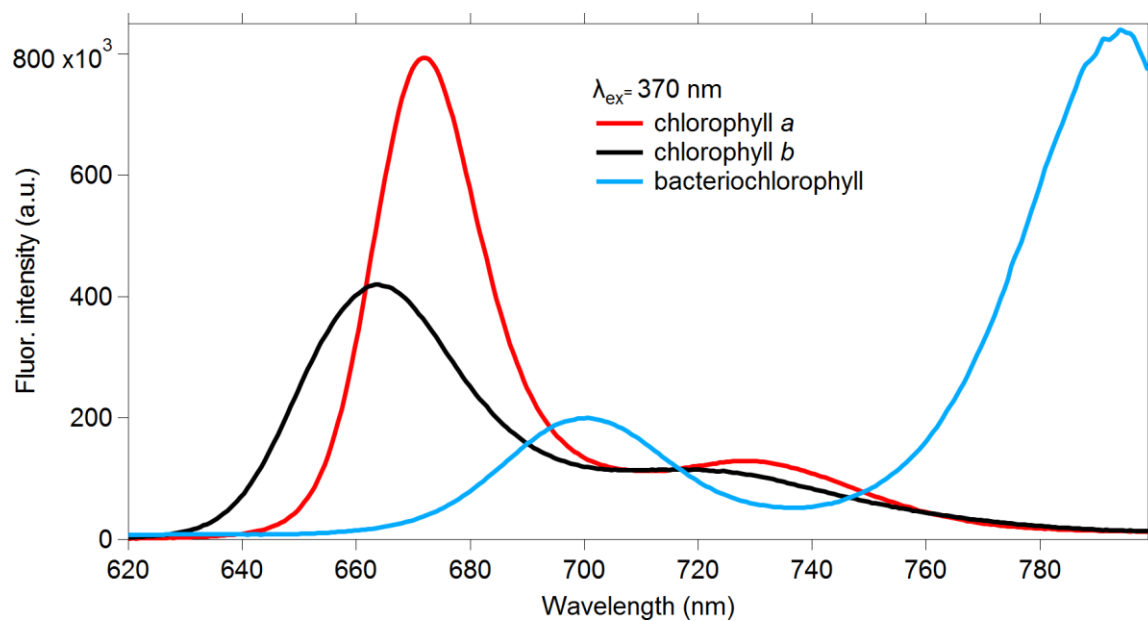

48 **Figure S11.** Fluorescence spectra of different chlorophyll types. Shown are reference spectra  
 49 for chlorophyll *a*, *b*, and bacteriochlorophyll at  $\lambda_{ex} = 370$  nm.

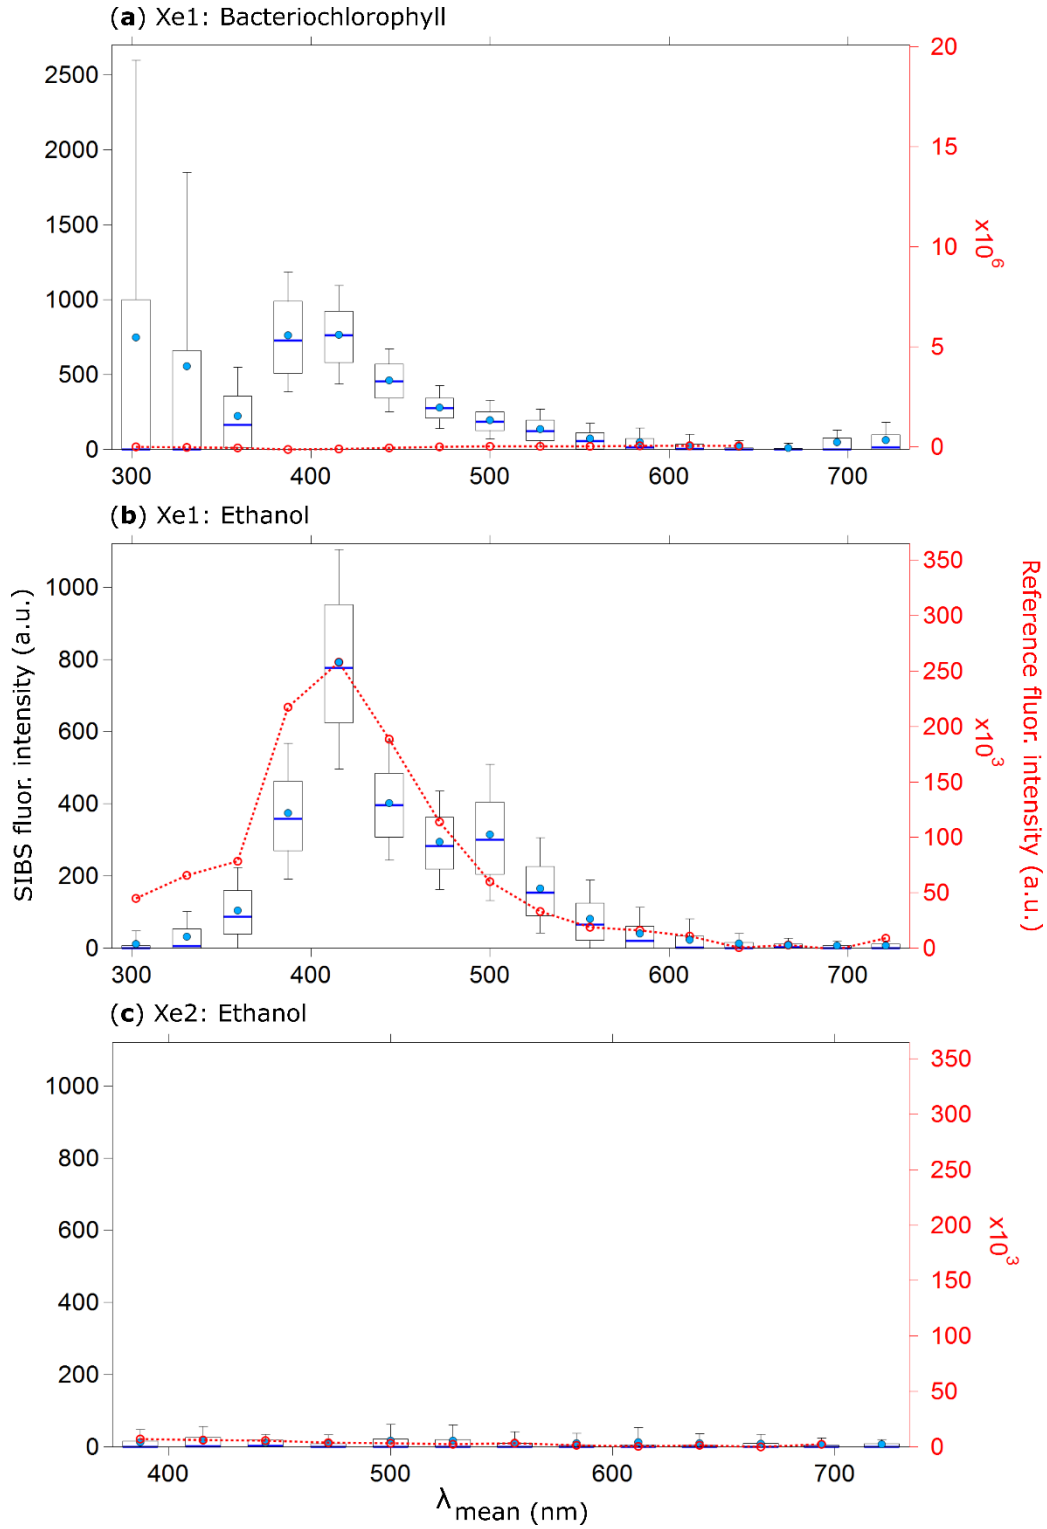

**Figure S12.** Fluorescence spectra of ethanol artefact. Highlighted are fluorescence spectra of bacteriochlorophyll at Xe1 (a) and uncorrected spectra of ethanol, after being vortexed for 15 min in nebulizer plastic bottles, at Xe1 (b) and Xe2 (c). Since no distinct fluorescence signal is detectable at Xe2 (c), the fluorescence emission of chlorophyll *a*, *b* and bacteriochlorophyll is considered to be unaffected.

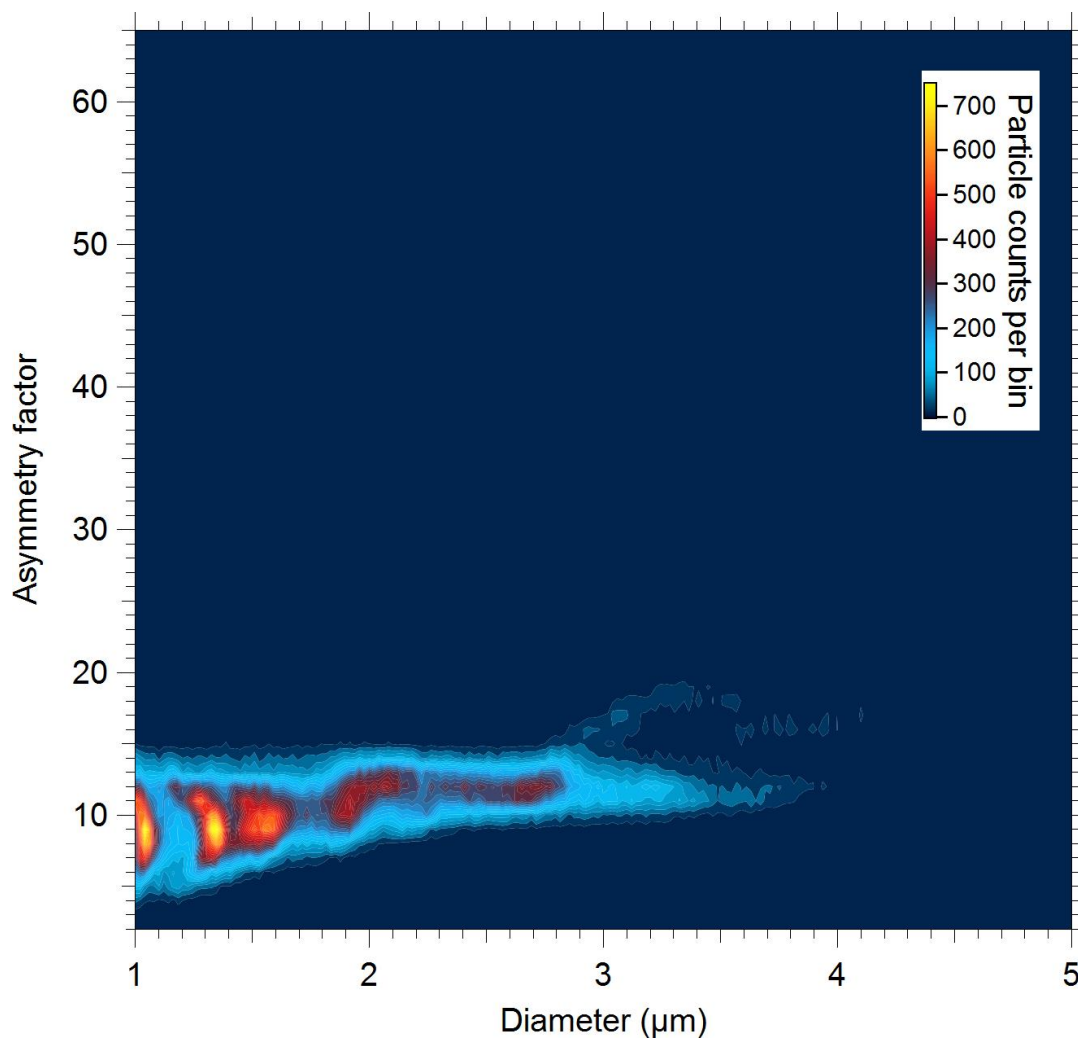

74 **Figure S13.** Particle asymmetry of ultrapure water droplets (163178 particles) displayed as  
 75 particle density histogram.



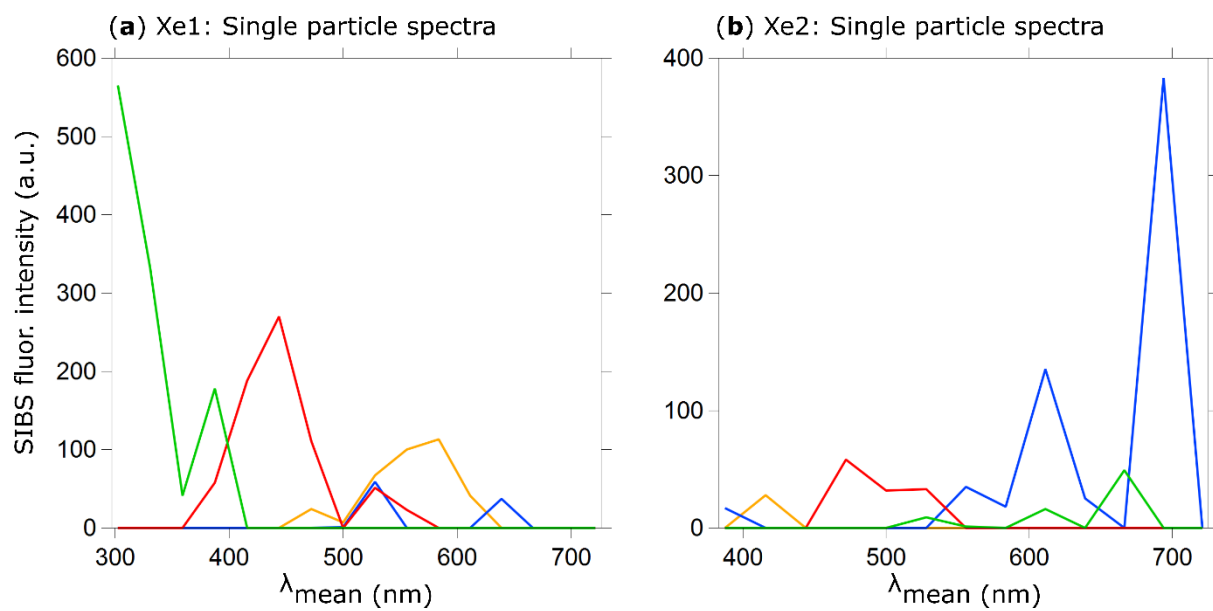

**Figure S14.** Exemplary fluorescence spectra of single ambient particles at Xe1 (a) and Xe2 (b).
